# Supplementary material
Source: Research Square preprint supplement (doi:10.21203/rs.3.rs-9347124/v1)
Supplement: Supplementary file 1 [file cdf30fdf82203ecf4a510b92.pdf]

**Table 1** Composition of solutions and media used for protoplast isolation, transfection and culture, as well as callus culture, somatic embryogenesis and plant regeneration of *C. arabica*

| Solution/<br>medium name                                  | Solution/ medium composition                                                                                                                                                                                                                                                                                                                                                                                                                                             | Application                                                                                                   |
|-----------------------------------------------------------|--------------------------------------------------------------------------------------------------------------------------------------------------------------------------------------------------------------------------------------------------------------------------------------------------------------------------------------------------------------------------------------------------------------------------------------------------------------------------|---------------------------------------------------------------------------------------------------------------|
| C,<br>callogenesis<br>medium (1)                          | half-strength MS (2) salts (Sigma-Aldrich); 40 $\mu$ M thiamine HCl, 4.8 $\mu$ M pyridoxine HCl, 8.1 $\mu$ M nicotinic acid, 13,3 $\mu$ M glycine, 0.55 mM myoinositol, 100 mg/L casein hydrolysate, 400 mg/L malt extract (Sigma-Aldrich), 2.26 $\mu$ M 2,4-dichlorophenoxyacetic acid (2,4-D), 4.9 $\mu$ M Indole-3-butyric acid (IBA), 9.8 $\mu$ M 6-( $\gamma$ , $\gamma$ -Dimethylallylamino)purine (2iP), 88 mM sucrose, 0.2 % (w/v) Phytigel™, pH 5.6, autoclaved | callus culture initiation                                                                                     |
| ECP,<br>embryogenic<br>callus<br>production<br>medium (1) | half-strength MS (2) salts, 80 $\mu$ M thiamine HCl, 270 $\mu$ M glycine, 330 $\mu$ M L-cysteine (Sigma-Aldrich), 1.11 mM myoinositol, 150 $\mu$ M adenine hemisulfate salt (Sigma-Aldrich), 200 mg/L casein hydrolysate, 800 mg/L malt extract, 4.52 $\mu$ M 2,4-D, 17.76 $\mu$ M 6-benzylaminopurine (6-BA), 88 mM sucrose, 0.32 % (w/v) Phytigel™, pH 5.6, autoclaved                                                                                                 | establishment of<br>embryogenic callus<br>cultures/ protoplast-<br>derived calli<br>proliferation and culture |
| Lysing<br>enzyme<br>mixture<br>solution                   | half-strength MS (2) salts without nitrogen, 0.77% (w/v) cellulase RS (Duchefa Biochemie), 0.77% (w/v), macerozyme R-10 (Duchefa Biochemie), 8 mM CaCl <sub>2</sub> · 2H <sub>2</sub> O (Duchefa Biochimie), 5 mM MES (Duchefa Biochimie), 0.6 M mannitol (Duchefa Biochimie), pH 5.6, filtered (0.22 $\mu$ m membrane; Millex®-GP, Millipore, Merck)                                                                                                                    | protoplast isolation                                                                                          |
| W5 solution<br>(3)                                        | 2 mM MES, containing 154 mM NaCl, 125 mM CaCl <sub>2</sub> , 5 mM KCl; ), pH 5.7, filtered (0.22 $\mu$ m membrane, Millex®-GP, Millipore, Merck)                                                                                                                                                                                                                                                                                                                         | protoplast purification                                                                                       |
| CPC, coffee<br>protoplasts<br>culture<br>medium           | half-strength MS (2) salts, 80 $\mu$ M thiamine HCl, 270 $\mu$ M glycine, 330 $\mu$ M L-cysteine (Sigma-Aldrich), 16.65 mM myoinositol, 150 $\mu$ M adenine hemisulfate salt (Sigma-Aldrich), 200 mg/L casein hydrolysate, 800 mg/L malt extract, 4.52 $\mu$ M 2,4-D, 17.76 $\mu$ M 6-BA, 88 mM sucrose, 0.55 M glucose, pH 5.6, autoclaved                                                                                                                              | protoplast culture                                                                                            |
| Alginate<br>solution                                      | half-strength MS (2) salts, 80 $\mu$ M thiamine HCl, 270 $\mu$ M glycine, 330 $\mu$ M L-cysteine (Sigma-Aldrich), 16.65 mM myoinositol, 150 $\mu$ M adenine hemisulfate salt (Sigma), 200 mg/L casein hydrolysate, 800 mg/L malt extract, 4.52 $\mu$ M 2,4-D, 17.76 $\mu$ M 6-BA, 58 mM sucrose, 0.5 M glucose, 1.6% (w/v) alginic acid sodium, pH 5.6, autoclaved                                                                                                       | protoplast embedding                                                                                          |
| Ca-agar<br>medium                                         | 0.6 M mannitol, 50 mM Kill CaCl <sub>2</sub> · 2H <sub>2</sub> O, 1.4% (w/v) plant agar (Duchefa Biochimie), pH 5.6, autoclaved                                                                                                                                                                                                                                                                                                                                          | alginate gelation                                                                                             |

|                                   |                                                                                                                                                                                                                                                                                     |                         |
|-----------------------------------|-------------------------------------------------------------------------------------------------------------------------------------------------------------------------------------------------------------------------------------------------------------------------------------|-------------------------|
| MMG solution (3)                  | 0.4 M mannitol, 4 mM MES (Duchefa Biochimie), 15 mM MgCl <sub>2</sub> (Duchefa Biochimie), pH 5.7, filtered (0.22 µm membrane; Millex®-GP, Millipore, Merck)                                                                                                                        | pre-transfection buffer |
| PEG4000-Ca <sup>2+</sup> solution | 0.2 M mannitol (Duchefa Biochimie), 100 mM CaCl <sub>2</sub> · 2H <sub>2</sub> O (Duchefa Biochimie), 40% PEG 4000 (Sigma - Aldrich), pH 5.7, filtered (0.22 µm membrane, Millex®-GP, Millipore, Merck)                                                                             | transfection solution   |
| R, regeneration medium (1)        | half-strength MS (2) salts, 40 µM thiamine HCl, 4.8 µM pyridoxine HCl, 8.1 µM nicotinic acid, 82.5 µM L-cysteine, 27 µM glycine, 1.11 mM myoinositol, 400 mg/L casein hydrolysate, 400 mg/L malt extract, 17.76 µM 6-BA, 117 mM sucrose, 0.32 % (w/v) Phytigel™, pH 5.6, autoclaved | plant regeneration      |
| M, maturation medium (1)          | semisolid MS (2) medium with full-strength salts, 40 µM thiamine HCl, 0.55 mM myoinositol, 1.3 µM 6-BA, 88 mM sucrose, 0.32 % (w/v) Phytigel™, pH 5.6, autoclaved                                                                                                                   | plant regeneration      |

---

(1) C, ECP, R and M media are described in Dechamp et al. (2015)

(2), MS, Murashige and Skoog (1962)

(3) MMG and W5 media are described in Yoo et al. (2007)
